# Supplementary material for: Controllable tuning of Fabry–Perot cavities via laser printing
Source: Royal Society of Chemistry journal article supplement (doi:10.1039/d0tc01662d), 2020-01-01
Supplement: d0tc01662d1.pdf [file d0tc01662d1.pdf]

Electronic Supporting Information

# Controllable tuning of Fabry-Perot cavities via laser printing

Tao Ding\*

Key Laboratory of Artificial Micro- and Nano-structures of Ministry of Education of China, School of Physics and Technology, Wuhan University, Wuhan, 430072 China.

\*Email: t.ding@whu.edu.cn

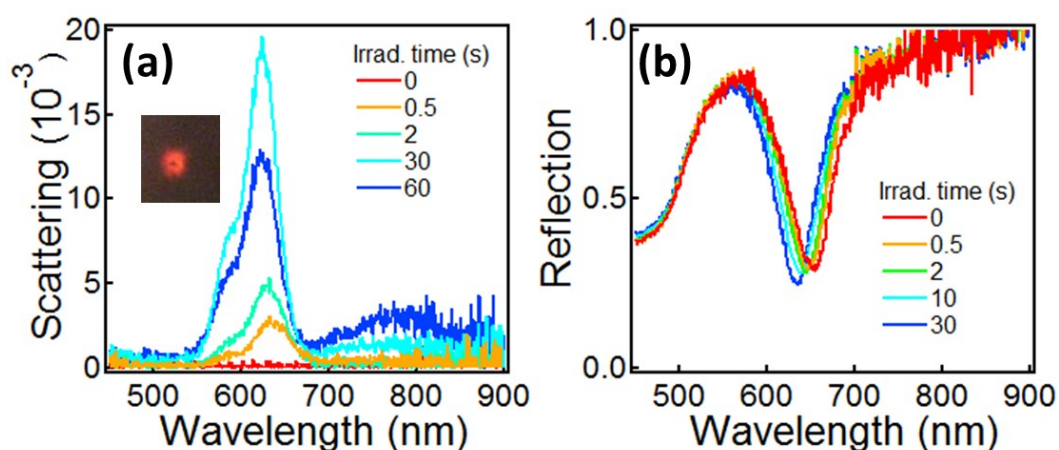

Figure S1. (a) Scattering and (b) reflection spectra of the Au/PS/Au (30nm/160nm/70nm) films with the increase of irradiation time. The irradiation power is 6.5mW.

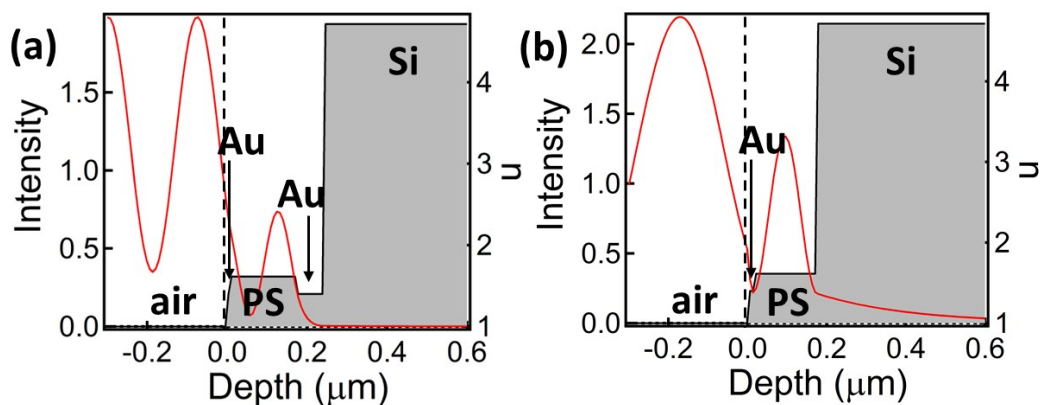

Figure S2. Light (446 nm) intensity profile within the FP cavity (a) Au/PS/Au, (b) Au/PS/Si. PS layer is 160 nm and Au over layer is 15 nm.
